# Supplementary material for: Focal disruption of DNA methylation dynamics at enhancers in IDH-mutant AML cells
Source: PubMed Central journal article supplement (PMC8979817; doi:10.1038/s41375-021-01476-y), 2021-12-06

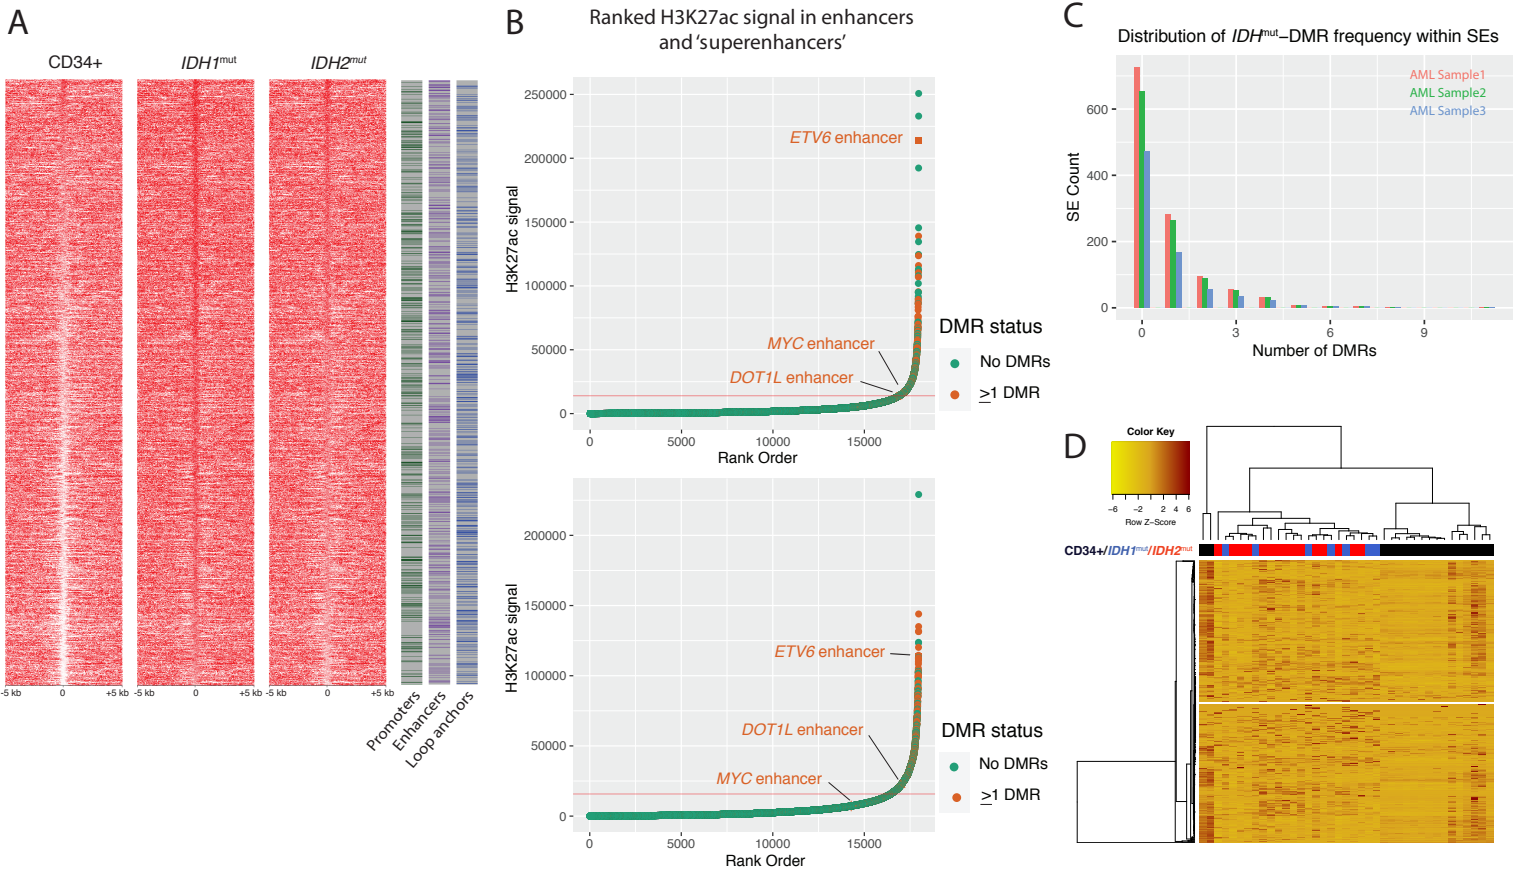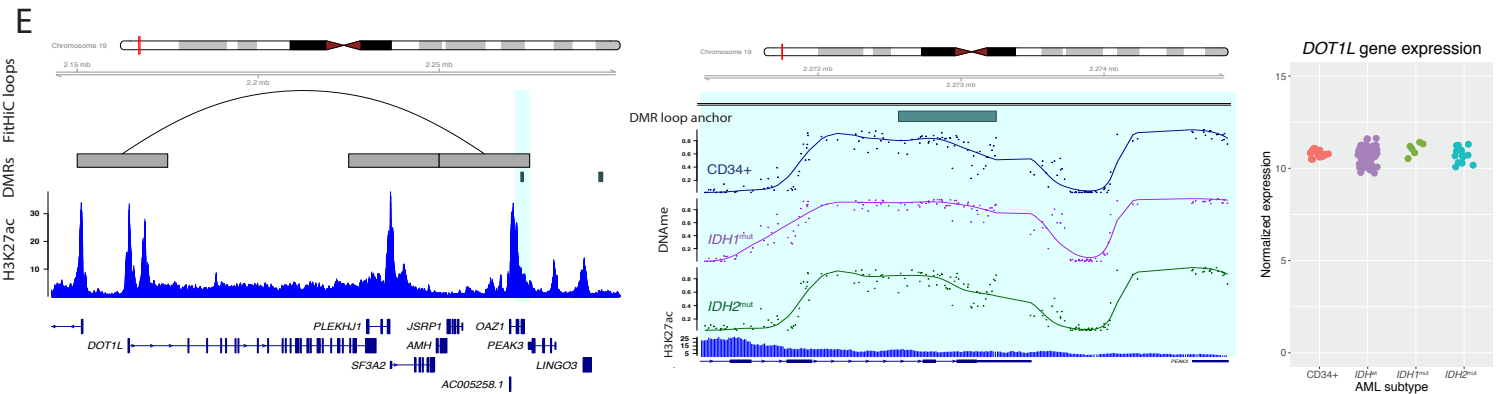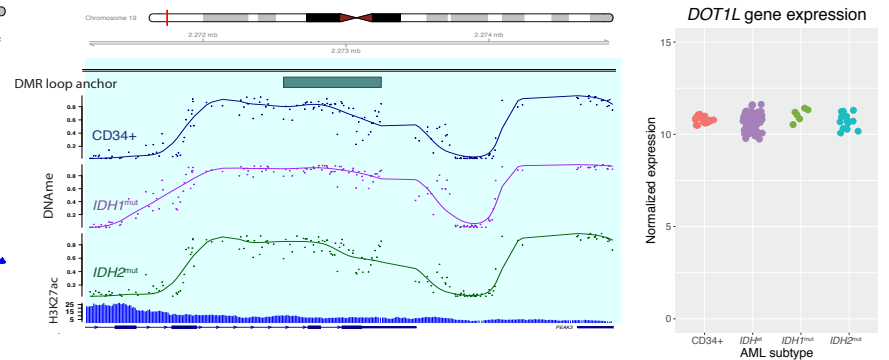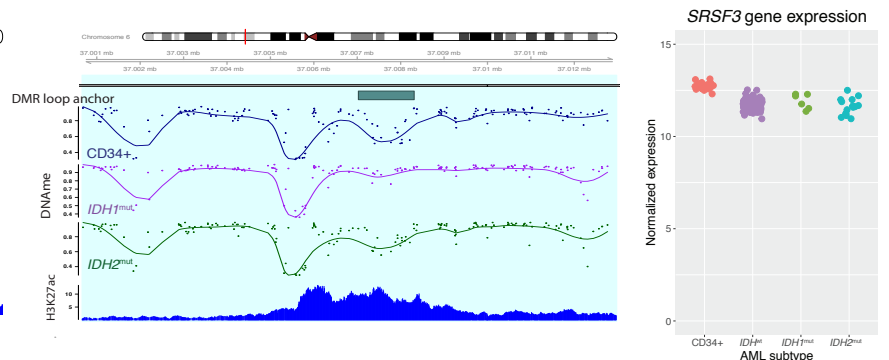

Supplement: 41375_2021_1476_MOESM6_ESM.pdf [file 41375_2021_1476_MOESM6_ESM.pdf]
